# Supplementary material for: Multiscale Modeling of Drug-induced Effects of ReDuNing Injection on Human Disease: From Drug Molecules to Clinical Symptoms of Disease
Source: PubMed Central journal article supplement (PMC4431313; doi:10.1038/srep10064), 2015-05-14
Supplement: srep10064-s1.pdf [file srep10064-s1.pdf]

# Multiscale Modeling of Drug-induced Effects of RDN Injection on Human Disease: From Drug Molecules to Clinical Symptoms of Disease

Fang Luo<sup>1</sup>, Jiangyong Gu<sup>1</sup>, Xinzhuang Zhang<sup>2</sup>, Lirong Chen<sup>1†</sup>, Liang Cao<sup>2</sup>, Na Li<sup>2</sup>, Zhenzhong Wang<sup>2</sup>,  
Wei Xiao<sup>2†</sup>, Xiaojie Xu<sup>1†</sup>

<sup>1</sup> Beijing National Laboratory for Molecular Sciences, State Key Lab of Rare Earth Material Chemistry and Applications, College of Chemistry and Molecular Engineering, Peking University, Beijing, China

<sup>2</sup> National Key Laboratory of Pharmaceutical New Technology for Chinese Medicine, Kanion Pharmaceutical Corporation, Lianyungang, Jiangsu Province, China

<sup>†</sup> Corresponding Author

Email: xiaojxu@pku.edu.cn (Xiaojie Xu);

Email: lirongchen@pku.edu.cn (Lirong Chen);

Email: xw\_kanion@163.com (Wei Xiao).

Supplementary information

---

\* The first two authors contributed equally to this work.

**Supplementary Table S0: Impact of the RDN ingredients on the pathway.**

| High Degree (31-62)                          |       | Middle degree (11-30)                            |       | Low degree (1-10)                            |       |
|----------------------------------------------|-------|--------------------------------------------------|-------|----------------------------------------------|-------|
| Pathway Name                                 | Score | Pathway Name                                     | Score | Pathway Name                                 | Score |
| Metabolism of xenobiotics by cytochrome P450 | 15    | Drug metabolism - cytochrome P450                | 10    | Metabolism of xenobiotics by cytochrome P450 | 16    |
| Drug metabolism - cytochrome P450            | 13    | Serotonergic synapse                             | 9     | Drug metabolism - cytochrome P450            | 15    |
| Insulin signaling pathway                    | 11    | Metabolism of xenobiotics by cytochrome P450     | 8     | Neurotrophin signaling pathway               | 12    |
| Serotonergic synapse                         | 11    | Dopaminergic synapse                             | 7     | Drug metabolism - other enzymes              | 12    |
| PI3K-Akt signaling pathway                   | 11    | Glycine_ serine and threonine metabolism         | 6     | Retinol metabolism                           | 12    |
| Regulation of actin cytoskeleton             | 10    | Tryptophan metabolism                            | 6     | Colorectal cancer                            | 11    |
| Tuberculosis                                 | 10    | Arginine and proline metabolism                  | 5     | MAPK signaling pathway                       | 10    |
| Peroxisome                                   | 9     | Histidine metabolism                             | 5     | Steroid hormone biosynthesis                 | 10    |
| Steroid hormone biosynthesis                 | 9     | Toxoplasmosis                                    | 5     | Focal adhesion                               | 10    |
| Focal adhesion                               | 9     | VEGF signaling pathway                           | 5     | FoxO signaling pathway                       | 10    |
| Chemokine signaling pathway                  | 9     | mTOR signaling pathway                           | 5     | Pancreatic cancer                            | 9     |
| Axon guidance                                | 9     | Gastric acid secretion                           | 5     | Insulin signaling pathway                    | 9     |
| Vascular smooth muscle contraction           | 9     | PI3K-Akt signaling pathway                       | 5     | Cysteine and methionine metabolism           | 9     |
| Endocytosis                                  | 8     | Inflammatory mediator regulation of TRP channels | 5     | PI3K-Akt signaling pathway                   | 9     |
| Neurotrophin signaling pathway               | 8     | MicroRNAs in cancer                              | 5     | Transcriptional misregulation in cancer      | 9     |
| Toll-like receptor signaling pathway         | 8     | Glioma                                           | 4     | Glycine_ serine and threonine metabolism     | 8     |
| Arginine and proline metabolism              | 8     | Neurotrophin signaling pathway                   | 4     | Regulation of actin cytoskeleton             | 8     |
| Tryptophan metabolism                        | 8     | MAPK signaling pathway                           | 4     | Axon guidance                                | 8     |
| T cell receptor signaling pathway            | 8     | Fc gamma R-mediated phagocytosis                 | 4     | Amyotrophic lateral sclerosis (ALS)          | 7     |
| Calcium signaling pathway                    | 8     | Cysteine and methionine metabolism               | 4     | Natural killer cell mediated cytotoxicity    | 7     |

**Supplementary Table S1: Network parameters of several key target proteins.**

| UNIPROT ID | Degree | Betweenness | UNIPROT Name                                                    |
|------------|--------|-------------|-----------------------------------------------------------------|
| P11509     | 12     | 0.14543929  | Cytochrome P450 2A6                                             |
| Q6VVX0     | 7      | 0.08930768  | Vitamin D 25-hydroxylase                                        |
| P19801     | 5      | 0.04696212  | Amiloride-sensitive amine oxidase [copper-containing]           |
| P26358     | 5      | 0.02598916  | DNA (cytosine-5)-methyltransferase 1                            |
| P27338     | 5      | 0.04885527  | Amine oxidase [flavin-containing] B                             |
| P52848     | 5      | 0.04287594  | Bifunctional heparan sulfate N-deacetylase/N-sulfotransferase 1 |
| P00558     | 4      | 0.0157713   | Phosphoglycerate kinase 1                                       |
| P06132     | 4      | 0.03534159  | Uroporphyrinogen decarboxylase                                  |
| P08254     | 4      | 0.00928838  | Stromelysin-1                                                   |
| P10635     | 4      | 0.08820364  | Cytochrome P450 2D6                                             |
| Q96EB6     | 4      | 0.01634897  | NAD-dependent protein deacetylase sirtuin-1                     |
| Q96GA7     | 4      | 0.01556111  | Serine dehydratase-like                                         |
| Q9Y2Q3     | 4      | 0.03170179  | Glutathione S-transferase kappa 1                               |
| O43157     | 3      | 0.01454842  | Plexin-B1                                                       |
| O43741     | 3      | 0.00851393  | 5'-AMP-activated protein kinase subunit beta-2                  |
| O95749     | 3      | 0.01313714  | Geranylgeranyl pyrophosphate synthase                           |
| P04040     | 3      | 0.01779917  | Catalase                                                        |
| P05108     | 3      | 0.0227335   | Cholesterol side-chain cleavage enzyme, mitochondrial           |
| P09960     | 3      | 0.01620902  | Leukotriene A-4 hydrolase                                       |
| P11511     | 3      | 0.01627829  | Aromatase                                                       |
| P12277     | 3      | 0.00610903  | Creatine kinase B-type                                          |
| P13569     | 3      | 0.01734233  | Cystic fibrosis transmembrane conductance regulator             |
| P21695     | 3      | 0.007109    | Glycerol-3-phosphate dehydrogenase [NAD(+)], cytoplasmic        |
| P29965     | 3      | 0.0219155   | CD40 ligand                                                     |
| P35520     | 3      | 0.00977714  | Cystathionine beta-synthase                                     |
| P50336     | 3      | 0.01099991  | Protoporphyrinogen oxidase                                      |
| P51149     | 3      | 0.014247    | Ras-related protein Rab-7a                                      |
| P51449     | 3      | 0.00649119  | Nuclear receptor ROR-gamma                                      |
| P51857     | 3      | 0.01829734  | 3-oxo-5-beta-steroid 4-dehydrogenase                            |
| P60763     | 3      | 0.01975373  | Ras-related C3 botulinum toxin substrate 3                      |

**Supplementary Table S2: The possible interaction network of tuberculosis.**

| Molecular ID | Autodock Score | Uniprot ID | Uniprot Name                                                      | Protein ID in Pathway | Pathway ID | Disease Name | Disease Symptom                                                                                                                                                      |
|--------------|----------------|------------|-------------------------------------------------------------------|-----------------------|------------|--------------|----------------------------------------------------------------------------------------------------------------------------------------------------------------------|
| UNPD149880   | 6.23           | O60603     | Toll-like receptor 2                                              | TLR2                  | hsa05152   | Tuberculosis | Breathing difficulty<br>Chest pain<br>Cough with mucus<br>Coughing up blood<br>Excessive sweating especially at night<br>Fatigue<br>Fever<br>Weight loss<br>Wheezing |
| UNPD189689   | 6.22           | O60603     | Toll-like receptor 2                                              | TLR2                  |            |              |                                                                                                                                                                      |
| UNPD60650    | 6.26           | P04049     | RAF proto-oncogene serine/threonine-protein kinase                | Raf1                  |            |              |                                                                                                                                                                      |
| UNPD189689   | 6.23           | P07339     | Cathepsin D                                                       | CathepsinD            |            |              |                                                                                                                                                                      |
| UNPD189689   | 6.23           | P25774     | Cathepsin S                                                       | CathepsinS            |            |              |                                                                                                                                                                      |
| RDN15        | 6.33           | P28482     | Mitogen-activated protein kinase 1                                | ERK1/2                |            |              |                                                                                                                                                                      |
| RDN1         | 6.5            | P29460     | Interleukin-12 subunit beta                                       | IL-12                 |            |              |                                                                                                                                                                      |
| RDN56        | 6.12           | P51149     | Ras-related protein Rab-7a                                        | Rab7                  |            |              |                                                                                                                                                                      |
| UNPD164733   | 7.14           | P51149     | Ras-related protein Rab-7a                                        | Rab7                  |            |              |                                                                                                                                                                      |
| UNPD189689   | 6.01           | P51149     | Ras-related protein Rab-7a                                        | Rab7                  |            |              |                                                                                                                                                                      |
| RDN47        | 6.08           | P99999     | Cytochrome c                                                      | CytC                  |            |              |                                                                                                                                                                      |
| UNPD60430    | 6.08           | P99999     | Cytochrome c                                                      | CytC                  |            |              |                                                                                                                                                                      |
| UNPD49205    | 6.29           | Q13555     | Calcium/calmodulin-dependent protein kinase type II subunit gamma | CAMKII                |            |              |                                                                                                                                                                      |
| UNPD149880   | 6.4            | Q15399     | Toll-like receptor 1                                              | TLR1/6                |            |              |                                                                                                                                                                      |
| UNPD189689   | 6.26           | Q15399     | Toll-like receptor 1                                              | TLR1/6                |            |              |                                                                                                                                                                      |
| UNPD51223    | 6.05           | Q15399     | Toll-like receptor 1                                              | TLR1/6                |            |              |                                                                                                                                                                      |
| RDN56        | 6.23           | Q16539     | Mitogen-activated protein kinase 14                               | p38                   |            |              |                                                                                                                                                                      |
| UNPD130563   | 6.51           | Q8NEB9     | Phosphatidylinositol 3-kinase catalytic subunit type 3            | VPS34                 |            |              |                                                                                                                                                                      |
| RDN20        | 6.24           | Q9UQM7     | Calcium/calmodulin-dependent protein kinase type II subunit alpha | CAMKII                |            |              |                                                                                                                                                                      |
| UNPD189689   | 6.59           | Q9UQM7     | Calcium/calmodulin-dependent protein kinase type II subunit alpha | CAMKII                |            |              |                                                                                                                                                                      |

The red color protein ID is also in the interaction network of influenza.

**Supplementary Table S3: The possible interaction network of influenza.**

| Molecular ID | Autodock Score | Uniprot ID | Uniprot Name                                                                   | Protein ID in Pathway | Pathway ID      | Disease Name                                                                                                                                                         | Disease Symptom                                                                                                                                                                              |
|--------------|----------------|------------|--------------------------------------------------------------------------------|-----------------------|-----------------|----------------------------------------------------------------------------------------------------------------------------------------------------------------------|----------------------------------------------------------------------------------------------------------------------------------------------------------------------------------------------|
| UNPD60650    | 6.26           | P04049     | RAF proto-oncogene serine/threonine-protein kinase                             | Raf1                  | hsa05164        | Influenza                                                                                                                                                            | Body aches<br>Chills<br>Dizziness<br>Dry cough<br>Flushed face<br>Headache<br>Increased breathing symptoms<br>Lack of energy<br>Nausea and vomiting<br>Runny nose<br>Sneezing<br>Sore throat |
| RDN56        | 6.89           | P05771     | Protein kinase C beta type                                                     | PKC $\beta$ II        |                 |                                                                                                                                                                      |                                                                                                                                                                                              |
| UNPD29278    | 6.18           | P17252     | Protein kinase C alpha type                                                    | PKC $\alpha$          |                 |                                                                                                                                                                      |                                                                                                                                                                                              |
| RDN15        | 6.33           | P28482     | Mitogen-activated protein kinase 1                                             | ERK1/2                |                 |                                                                                                                                                                      |                                                                                                                                                                                              |
| RDN1         | 6.5            | P29460     | Interleukin-12 subunit beta                                                    | IL-12                 |                 |                                                                                                                                                                      |                                                                                                                                                                                              |
| UNPD130563   | 6.32           | P29597     | Non-receptor tyrosine-protein kinase TYK2                                      | Tyk2/Jtk1             |                 |                                                                                                                                                                      |                                                                                                                                                                                              |
| RDNB23       | 6.16           | P42336     | Phosphatidylinositol 4,5-bisphosphate 3-kinase catalytic subunit alpha isoform | PI3K                  |                 |                                                                                                                                                                      |                                                                                                                                                                                              |
| UNPD29278    | 7.03           | P48736     | Phosphatidylinositol 4,5-bisphosphate 3-kinase catalytic subunit gamma isoform | PI3K                  |                 |                                                                                                                                                                      |                                                                                                                                                                                              |
| RDN47        | 6.08           | P99999     | Cytochrome c                                                                   | CytC                  |                 |                                                                                                                                                                      |                                                                                                                                                                                              |
| UNPD60430    | 6.08           | P99999     | Cytochrome c                                                                   | CytC                  |                 |                                                                                                                                                                      |                                                                                                                                                                                              |
| UNPD149880   | 6              | Q02750     | Dual specificity mitogen-activated protein kinase kinase 1                     | MEK1/2                | Avian influenza | Cough<br>Diarrhea<br>Fever greater than 100.4°F (38°C)<br>General ill feeling(malaise)<br>Headache<br>Muscle aches<br>Runny nose<br>Sore throat<br>Trouble breathing |                                                                                                                                                                                              |
| UNPD51223    | 6.92           | Q02750     | Dual specificity mitogen-activated protein kinase kinase 1                     | MEK1/2                |                 |                                                                                                                                                                      |                                                                                                                                                                                              |
| RDN56        | 6.23           | Q16539     | Mitogen-activated protein kinase 14                                            | p38                   |                 |                                                                                                                                                                      |                                                                                                                                                                                              |
| RDN21        | 6.69           | Q9NZJ5     | Eukaryotic translation initiation factor 2-alpha kinase 3                      | PKR                   |                 |                                                                                                                                                                      |                                                                                                                                                                                              |

The red color protein ID is also in the interaction network of tuberculosis.

**Supplementary Table S4: The relation between several diseases and ZHENG.**

| <b>Disease ID</b> | <b>Disease Name</b>                                                             | <b>Disease category</b>                           | <b>ZHENG</b> |
|-------------------|---------------------------------------------------------------------------------|---------------------------------------------------|--------------|
| H00630            | Disease_Rheumatoid arthritis                                                    | Autoimmune disease                                | Hot ZHENG    |
| H00912            | Disease_Tumor necrosis factor receptor-associated periodic syndrome (TRAPS)     | Autoimmune disease                                | Hot ZHENG    |
| H00001            | Disease_Acute lymphoblastic leukemia (ALL) (precursor B lymphoblastic leukemia) | Cancer                                            | Hot ZHENG    |
| H00002            | Disease_Acute lymphoblastic leukemia (ALL) (precursor T lymphoblastic leukemia) | Cancer                                            | Hot ZHENG    |
| H00003            | Disease_Acute myeloid leukemia (AML)                                            | Cancer                                            | Hot ZHENG    |
| H00004            | Disease_Chronic myeloid leukemia (CML)                                          | Cancer                                            | Hot ZHENG    |
| H00007            | Disease_Hodgkin lymphoma                                                        | Cancer                                            | Hot ZHENG    |
| H00008            | Disease_Burkitt lymphoma                                                        | Cancer                                            | Hot ZHENG    |
| H00010            | Disease_Multiple myeloma                                                        | Cancer                                            | Hot ZHENG    |
| H00011            | Disease_Lymphoplasmacytic lymphoma                                              | Cancer                                            | Hot ZHENG    |
| H00013            | Disease_Small cell lung cancer                                                  | Cancer                                            | Hot ZHENG    |
| H00020            | Disease_Colorectal cancer                                                       | Cancer                                            | Hot ZHENG    |
| H00034            | Disease_Carcinoid                                                               | Cancer                                            | Hot ZHENG    |
| H00295            | Disease_Viral myocarditis                                                       | Cardiovascular disease                            | Hot ZHENG    |
| H00465            | Disease_Fragile X Syndrome                                                      | Chromosomal abnormality                           | Cold ZHENG   |
| H00606            | Disease_Early infantile epileptic encephalopathy                                | Congenital disorder; Epilepsy                     | Hot ZHENG    |
| H00480            | Disease_Non-syndromic X-linked mental retardation                               | Congenital disorder; Mental retardation           | Hot ZHENG    |
| H00577            | Disease_Syndromic X-linked mental retardation with epilepsy or seizures         | Congenital disorder; Mental retardation; Epilepsy | Hot ZHENG    |
| H00478            | Disease_Prader-Willi and Angelman syndromes                                     | Developmental disorder                            | Hot ZHENG    |
| H00570            | Disease_Kabuki syndrome                                                         | Developmental disorder                            | Cold ZHENG   |
| H00935            | Disease_Cold-induced sweating syndrome (CISS) and Crisponi syndrome (CRISPS)    | Developmental disorder                            | Hot ZHENG    |
| H00992            | Disease_Seckel syndrome                                                         | Developmental disorder                            | Cold ZHENG   |
| H01288            | Disease_Mosaic variegated aneuploidy (MVA) syndrome                             | Developmental disorder                            | Cold ZHENG   |

|        |                                                             |                                                            |                    |
|--------|-------------------------------------------------------------|------------------------------------------------------------|--------------------|
| H00539 | Disease_PTEN hamartoma tumor syndrome (PHTS)                | Developmental disorder; Cancer                             | Cold and Hot ZHENG |
| H00523 | Disease_Noonan syndrome and related disorders               | Developmental disorder; Cardiovascular disease             | Hot ZHENG          |
| H00910 | Disease_Hirschsprung disease (HD)                           | Developmental disorder; Digestive disease                  | Hot ZHENG          |
| H00267 | Disease_Holoprosencephaly (HPE)                             | Developmental disorder; Nervous system disease             | Cold ZHENG         |
| H00979 | Disease_Caudal regression syndrome and Sirenomelia          | Developmental disorder; Nervous system disease             | Hot ZHENG          |
| H00560 | Disease_Pseudoxanthoma elasticum                            | Developmental disorder; Skin and connective tissue disease | Cold ZHENG         |
| H00249 | Disease_Thyroid hormone resistance syndrome                 | Endocrine disease                                          | Hot ZHENG          |
| H00251 | Disease_Thyroid dysmorphogenesis                            | Endocrine disease                                          | Cold and Hot ZHENG |
| H00258 | Disease_Aldosterone synthase deficiency                     | Endocrine disease                                          | Hot ZHENG          |
| H00252 | Disease_Congenital nephrogenic diabetes insipidus (NDI)     | Endocrine disease; Kidney disease                          | Hot ZHENG          |
| H00239 | Disease_Bartter syndrome                                    | Endocrine disease; Urinary system disease                  | Hot ZHENG          |
| H01027 | Disease_Anophthalmia and microphthalmia (A/M)               | Eye disease                                                | Cold ZHENG         |
| H00238 | Disease_Fanconi anemia                                      | Hematologic disease                                        | Cold ZHENG         |
| H00081 | Disease_Hashimoto's thyroiditis                             | Immune system disease                                      | Hot ZHENG          |
| H00083 | Disease_Allograft rejection                                 | Immune system disease                                      | Hot ZHENG          |
| H00282 | Disease_Cryopyrin associated periodic syndrome (CAPS)       | Immune system disease                                      | Hot ZHENG          |
| H00288 | Disease_Familial Mediterranean fever (FMF)                  | Immune system disease                                      | Hot ZHENG          |
| H01109 | Disease_Chronic mucocutaneous candidiasis (CMC)             | Immune system disease                                      | Cold ZHENG         |
| H01232 | Disease_Syndromic multisystem autoimmune disease            | Immune system disease                                      | Cold ZHENG         |
| H00110 | Disease_Cholera                                             | Infectious disease                                         | Hot ZHENG          |
| H00111 | Disease_Typhoid fever                                       | Infectious disease                                         | Hot ZHENG          |
| H00277 | Disease_Enterohemorrhagic Escherichia coli (EHEC) infection | Infectious disease                                         | Hot ZHENG          |
| H00299 | Disease_Shigellosis                                         | Infectious disease                                         | Hot ZHENG          |
| H00311 | Disease_Legionellosis                                       | Infectious disease                                         | Hot ZHENG          |
| H00319 | Disease_Pertussis                                           | Infectious disease                                         | Hot ZHENG          |

|        |                                                            |                                                        |            |
|--------|------------------------------------------------------------|--------------------------------------------------------|------------|
| H00342 | Disease_Tuberculosis                                       | Infectious disease                                     | Hot ZHENG  |
| H00357 | Disease_African trypanosomiasis                            | Infectious disease                                     | Hot ZHENG  |
| H00358 | Disease_Chagas disease                                     | Infectious disease                                     | Hot ZHENG  |
| H00359 | Disease_Leishmaniasis                                      | Infectious disease                                     | Hot ZHENG  |
| H00360 | Disease_Amoebiasis                                         | Infectious disease                                     | Hot ZHENG  |
| H00361 | Disease_Malaria                                            | Infectious disease                                     | Hot ZHENG  |
| H00367 | Disease_Infectious mononucleosis                           | Infectious disease                                     | Hot ZHENG  |
| H00394 | Disease_Measles                                            | Infectious disease                                     | Hot ZHENG  |
| H00398 | Disease_Influenza                                          | Infectious disease                                     | Hot ZHENG  |
| H00399 | Disease_Avian influenza                                    | Infectious disease                                     | Hot ZHENG  |
| H00413 | Disease_Hepatitis C                                        | Infectious disease                                     | Hot ZHENG  |
| H00435 | Disease_Toxoplasmosis                                      | Infectious disease                                     | Hot ZHENG  |
| H00069 | Disease_Glycogen storage diseases (GSD)                    | Inherited metabolic disease                            | Hot ZHENG  |
| H00118 | Disease_Congenital disorders of glycosylation (CDG) type I | Inherited metabolic disease                            | Cold ZHENG |
| H00161 | Disease_Smith-Lemli-Opitz syndrome                         | Inherited metabolic disease                            | Hot ZHENG  |
| H00179 | Disease_3-Hydroxy-3-methylglutaryl-CoA lyase deficiency    | Inherited metabolic disease                            | Hot ZHENG  |
| H01071 | Disease_Acute alcohol sensitivity                          | Inherited metabolic disease                            | Hot ZHENG  |
| H01283 | Disease_Malonyl-CoA decarboxylase deficiency               | Inherited metabolic disease                            | Hot ZHENG  |
| H01398 | Disease_Primary hyperammonemic disorders                   | Inherited metabolic disease                            | Hot ZHENG  |
| H01400 | Disease_Secondary hyperammonemia                           | Inherited metabolic disease                            | Cold ZHENG |
| H00881 | Disease_Li-Fraumeni syndrome                               | Inherited metabolic disease; Cancer                    | Hot ZHENG  |
| H00802 | Disease_Ehlers-Danlos syndrome (EDS)                       | Inherited metabolic disease; Connective tissue disease | Hot ZHENG  |
| H00216 | Disease_Congenital adrenal hyperplasia (CAH)               | Inherited metabolic disease; Endocrine disease         | Hot ZHENG  |
| H01199 | Disease_Hyperalphalipoproteinemia                          | Inherited metabolic disease; Hematologic disease       | Cold ZHENG |
| H01117 | Disease_Majeed syndrome                                    | Inherited metabolic disease; Immune system disease     | Hot ZHENG  |



|        |                                                               |                                                                                |            |
|--------|---------------------------------------------------------------|--------------------------------------------------------------------------------|------------|
| H00137 | Disease_Niemann-Pick disease (NPD) typeA and B                | Inherited metabolic disease; Lysosomal storage disease                         | Hot ZHENG  |
| H00275 | Disease_Cystinosis                                            | Inherited metabolic disease; Lysosomal storage disease                         | Cold ZHENG |
| H00124 | Disease_GM2 gangliosidoses                                    | Inherited metabolic disease; Lysosomal storage disease; Nervous system disease | Cold ZHENG |
| H00424 | Disease_Defects in the degradation of sphingomyelin           | Inherited metabolic disease; Lysosomal storage disease; Nervous system disease | Hot ZHENG  |
| H00426 | Disease_Defects in the degradation of ganglioside             | Inherited metabolic disease; Lysosomal storage disease; Nervous system disease | Cold ZHENG |
| H00849 | Disease_Creatine deficiency syndrome                          | Inherited metabolic disease; Mental retardation                                | Hot ZHENG  |
| H00469 | Disease_Mitochondrial DNA depletion syndrome (MDS)            | Inherited metabolic disease; Mitochondrial disease                             | Hot ZHENG  |
| H00174 | Disease_Methylmalonic aciduria (MMA)                          | Inherited metabolic disease; Nervous system disease                            | Cold ZHENG |
| H00692 | Disease_Lowe syndrome                                         | Inherited metabolic disease; Nervous system disease                            | Hot ZHENG  |
| H00854 | Disease_Wolfram syndrome (WFS)                                | Inherited metabolic disease; Neurodegenerative disease                         | Cold ZHENG |
| H01390 | Disease_Mitochondrial neurogastrointestinal encephalomyopathy | Inherited metabolic disease; Neurodegenerative disease; Mitochondrial disease  | Hot ZHENG  |
| H00176 | Disease_Adrenoleukodystrophy (ALD)                            | Inherited metabolic disease; Neurodegenerative disease; Peroxisomal disease    | Cold ZHENG |
| H00202 | Disease_Hepatic porphyria                                     | Inherited metabolic disease; Skin and connective tissue disease; Liver disease | Hot ZHENG  |
| H00756 | Disease_Pitt-Hopkins syndrome                                 | Mental retardation                                                             | Hot ZHENG  |
| H00409 | Disease_Type II diabetes mellitus                             | Metabolic disease; Endocrine disease                                           | Hot ZHENG  |
| H00410 | Disease_Maturity onset diabetes of the young (MODY)           | Metabolic disease; Endocrine disease                                           | Cold ZHENG |
| H00937 | Disease_Precocious puberty                                    | Metabolic disease; Endocrine disease                                           | Cold ZHENG |
| H00408 | Disease_Type I diabetes mellitus                              | Metabolic disease; Immune system disease; Endocrine disease                    | Hot ZHENG  |
| H00420 | Disease_Familial partial lipodystrophy (FPL)                  | Metabolic disease; Skin and connective tissue disease                          | Hot ZHENG  |
| H00652 | Disease_Solitary median maxillary central incisor syndrome    | Mouth and dental disease                                                       | Cold ZHENG |
| H00594 | Disease_Distal muscular dystrophies                           | Musculoskeletal disease; Nervous system disease                                | Hot ZHENG  |
| H00595 | Disease_Myofibrillar myopathies (MFM)                         | Musculoskeletal disease; Nervous system disease                                | Hot ZHENG  |
| H00265 | Disease_Hereditary sensory and autonomic neuropathy           | Nervous system disease                                                         | Hot ZHENG  |
| H00775 | Disease_Familial or sporadic hemiplegic migraine              | Nervous system disease                                                         | Hot ZHENG  |
| H00856 | Disease_Distal hereditary motor neuropathies (dHMN)           | Nervous system disease                                                         | Hot ZHENG  |

|        |                                                                                                 |                                                                                           |                    |
|--------|-------------------------------------------------------------------------------------------------|-------------------------------------------------------------------------------------------|--------------------|
| H00916 | Disease_Congenital central hypoventilation syndrome (CCHS)                                      | Nervous system disease                                                                    | Hot ZHENG          |
| H01161 | Disease_Aromatic L-amino acid decarboxylase (AADC) deficiency                                   | Nervous system disease                                                                    | Hot ZHENG          |
| H01391 | Disease_Familial episodic pain syndrome (FEPS)                                                  | Nervous system disease                                                                    | Hot ZHENG          |
| H00845 | Disease_Familial amyloidosis                                                                    | Nervous system disease; Inherited metabolic disease                                       | Hot ZHENG          |
| H01118 | Disease_Progressive external ophthalmoplegia (PEO)                                              | Nervous system disease; Musculoskeletal disease; Eye disease; Inherited metabolic disease | Hot ZHENG          |
| H00915 | Disease_Tuberous sclerosis complex (TSC)                                                        | Nervous system disease; Skin and connective tissue disease                                | Cold ZHENG         |
| H00057 | Disease_Parkinson's disease (PD)                                                                | Neurodegenerative disease                                                                 | Hot ZHENG          |
| H00061 | Disease_Prion diseases                                                                          | Neurodegenerative disease                                                                 | Hot ZHENG          |
| H00455 | Disease_Spinal muscular atrophy (SMA)                                                           | Neurodegenerative disease                                                                 | Hot ZHENG          |
| H00933 | Disease_Hereditary pancreatitis                                                                 | Pancreas disease                                                                          | Hot ZHENG          |
| H00093 | Disease_Combined immunodeficiencies (CIDs)                                                      | Primary immunodeficiency                                                                  | Hot ZHENG          |
| H00107 | Disease_Other well-defined immunodeficiency syndromes                                           | Primary immunodeficiency                                                                  | Cold and Hot ZHENG |
| H00540 | Disease_Osteoporosis_lymphedema_anhydrotic ectodermal dysplasia with immunodeficiency (OLEDAID) | Primary immunodeficiency; Skeletal dysplasia                                              | Hot ZHENG          |
| H00599 | Disease_46_XX disorders of sex development (Disorders related to androgen excess)               | Reproductive system disease                                                               | Hot ZHENG          |
| H00607 | Disease_46_XY disorders of sex development (Disorders of gonadal development1)                  | Reproductive system disease                                                               | Cold and Hot ZHENG |
| H00608 | Disease_46_XY disorders of sex development (Disorders in androgen synthesis or action)          | Reproductive system disease                                                               | Cold and Hot ZHENG |
| H01122 | Disease_Pulmonary alveolar proteinosis (PAP)                                                    | Respiratory disease                                                                       | Hot ZHENG          |
| H00894 | Disease_FG syndrome (FGS)                                                                       | Skeletal dysplasia; Nervous system disease                                                | Hot ZHENG          |
| H00651 | Disease_Ectodermal dysplasia                                                                    | Skin and connective tissue disease                                                        | Hot ZHENG          |
